# Supplementary material for: The Influence of Adolescent Health-related Behaviors on Degenerative Low Back Pain Hospitalizations and Surgeries in Adulthood: A Longitudinal Study
Source: PubMed Central journal article supplement (PMC11581437; doi:10.1097/brs.0000000000005112), 2024-08-06
Supplement: brs-49-1750-s004.pdf [file brs-49-1750-s004.pdf]

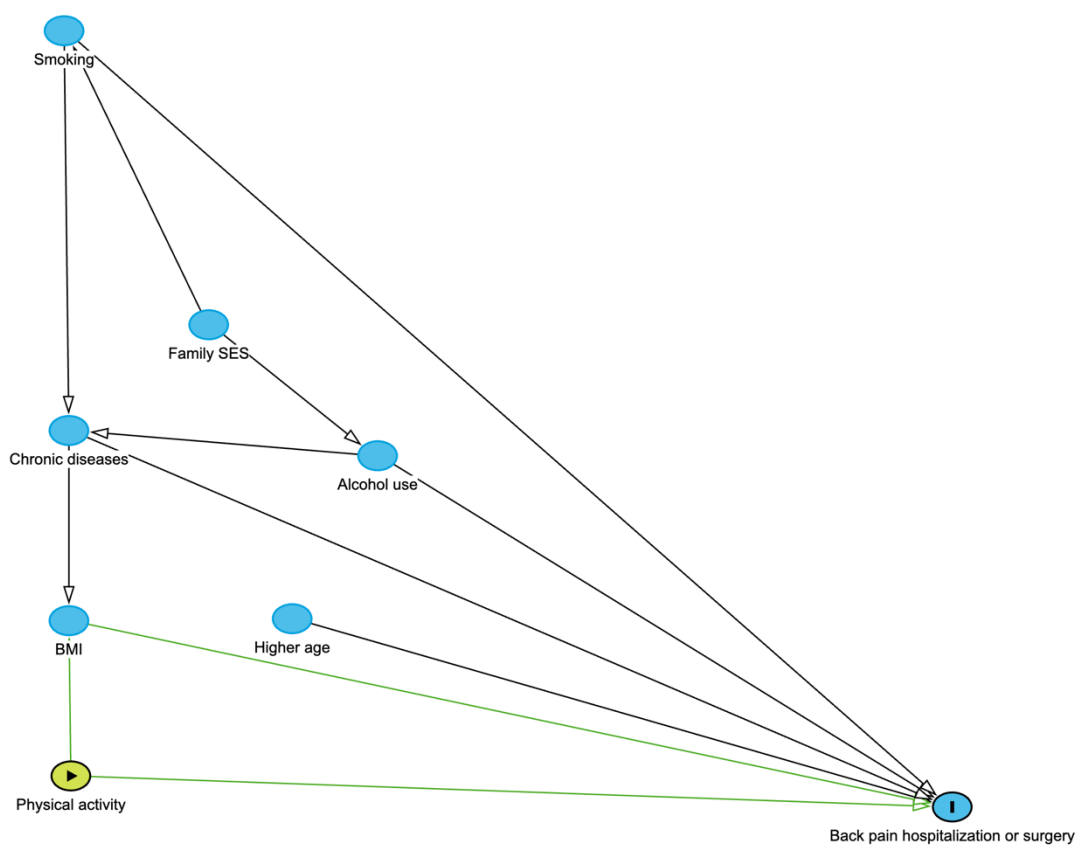

Supplementary Figure 1. DAG: Physical activity and the risk for degenerative low back pain hospitalizations or spine surgeries.
